# Supplementary material
Source: PubMed Central journal article supplement (PMC3558543)

# Supplementary Figure 1

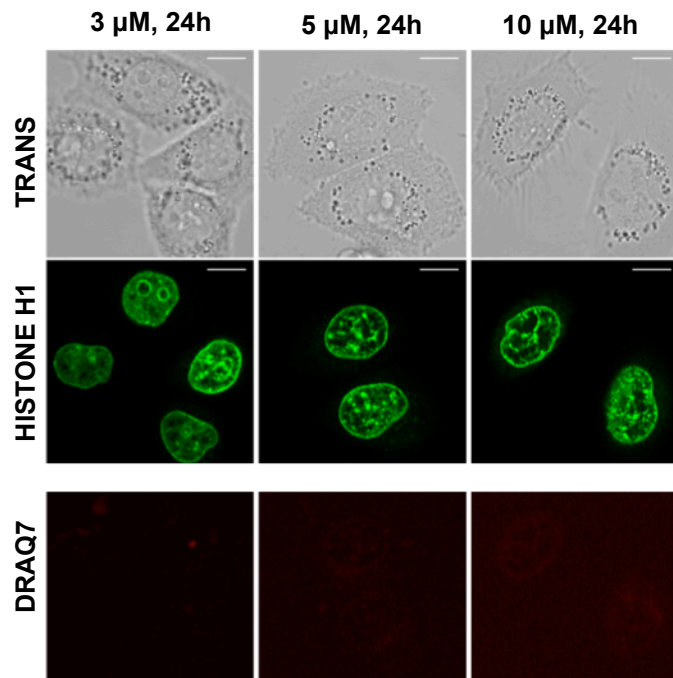

Supplement: NIHMS415238-supplement-Suppl_Fig__1.pdf [file NIHMS415238-supplement-Suppl_Fig__1.pdf]
